# 1 **A simple device to immobilize protists for electrophysiology and** 2 **microinjection**

3 Anirudh Kulkarni<sup>1</sup>, Nicolas Escoubet<sup>2</sup>, Léa-Laetitia Pontani<sup>2\*</sup>, Alexis Michel Prevost<sup>2\*</sup>, Romain Brette<sup>1\*</sup>

4 <sup>1</sup> Sorbonne Université, INSERM, CNRS, Institut de la Vision, 17 rue Moreau, F-75012 Paris, France

5 <sup>2</sup> Sorbonne Université, CNRS, Institut de Biologie Paris-Seine (IBPS), Laboratoire Jean Perrin (LJP), F-  
6 75005, Paris, France

7 \* Corresponding authors: [lea-laetitia.pontani@sorbonne-universite.fr](mailto:lea-laetitia.pontani@sorbonne-universite.fr), [alexis.prevost@sorbonne-universite.fr](mailto:alexis.prevost@sorbonne-universite.fr), [romain.brette@inserm.fr](mailto:romain.brette@inserm.fr)  
8

9

## 10 **ABSTRACT**

11 We present a simple device to mechanically immobilize motile cells such as ciliates and flagellates. It  
12 can be used in particular for intracellular electrophysiology and microinjection. A transparent filter  
13 with holes smaller than the specimen is stretched over an outlet. A flow is induced by either a  
14 peristaltic pump or a depressurized tank, mechanically entraining cells to the bottom, where they  
15 immobilize against the filter. The cells swim again freely as soon as the flow is stopped. We  
16 demonstrate the device by recording action potentials in *Paramecium* and injecting a fluorescent dye  
17 in the cytosol.

18

19 **INTRODUCTION**

20 *Paramecium* can swim at speeds exceeding ten times its body length per second. Thus, a key  
21 requirement to experimentally manipulate it is to immobilize it without damaging it. Classically,  
22 intracellular electrophysiology in ciliates such as *Paramecium* and *Tetrahymena* was performed with  
23 the hanging droplet method (Hennessey and Kuruvilla, 1999; Naitoh and Eckert, 1972). A specimen is  
24 picked with as little fluid as possible and placed hanging below a coverslip; the later use of inverted  
25 microscopes allowed the droplet to be placed on top of the coverslip (Houten, 1979; Valentine and Van  
26 Houten, 2016). When water evaporates, the cell is captured by surface tension. A hooked pipette is  
27 then gently but swiftly raised into the cell, effectively pinning it to the coverslip. The cell is then quickly  
28 covered by the bath before it dries out completely. This technique requires substantial dexterity. An  
29 additional difficulty is that this technique provides no electrical signal for impaling the cell, which must  
30 then entirely rely on visual inspection. A less common strategy is to catch the swimming organism with  
31 a suction pipette (Jonsson and Sand, 1987). For microinjection, the standard method consists in  
32 covering the specimen with oil, removing fluid with a needle until the cell is immobilized, then  
33 performing the microinjection and releasing the cell (Beisson et al., 2010).

34 Here we present a simple device to mechanically immobilize while providing an electrical signal. A  
35 transparent filter with holes smaller than the cells is placed at the bottom of the device, immersed in  
36 the bath. Fluid is then removed from the bottom using a peristaltic pump or a depressurized reservoir.  
37 In a few seconds, cells are immobilized against the filter. A pipette can then be inserted into the cell. If  
38 the pipette is filled with a conducting solution, successful impalement is indicated by a drop in  
39 measured potential. We demonstrate the use of the device by recording action potentials in  
40 *Paramecium Tetraurelia* using two electrodes, and microinjecting Alexa Fluor into the cytosol.

41

42

## 43 MATERIALS AND METHODS

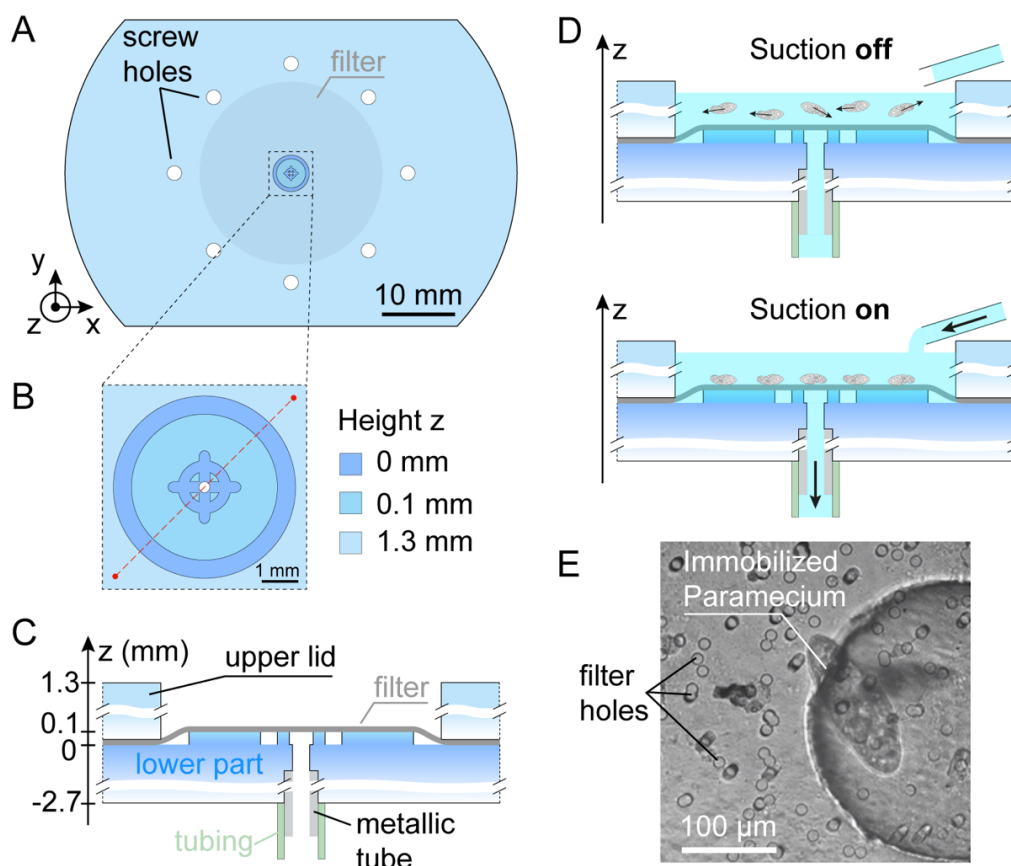

44

45 **Figure 1 – Sketch of the immobilization device.** (A) Top view of the device. The filter (shaded grey)  
46 (shaded grey disk) is sandwiched between an upper lid and a lower part all made in Plexiglas, and tightened together  
47 with 8 screws. (B) Close-up on the centered microfluidic mesa-like structure. The  $z=0$  height origin is  
48 arbitrarily taken at the base of the mesa-like structure. (C) Lateral view along the red dashed-line cut  
49 in (B). (D) Principle of the immobilization process. Without suction (upper panel), *Paramecia* in the  
50 centered pool swim freely. Once suction is switched on (lower panel), *Paramecia* are immobilized  
51 against the filter. Their bathing liquid is pumped using either a peristaltic pump or a depression tank.  
52 The liquid is reinjected (when using the pump) or supplemented (when using the depression tank) in  
53 the pool to maintain the level of the bath constant. (E) Image in transmission of a single *Paramecium*  
54 immobilized with the current device (top view).

### 55 *Paramecium* culture and manipulation

56 Cultures of *Paramecium tetraurelia* (obtained from Éric Meyer, Institut de Biologie, École Normale  
57 Supérieure, Paris, France) were maintained by reinjecting each week 1 mL of culture inoculated with  
58 *Klebsiella pneumoniae* into 5 mL of Wheat Grass Powder (WGP) buffer supplemented with 1  $\mu$ L of beta-  
59 sitosterol. Cultures are kept at room temperature. Prior to each experiment, the culture is filtered  
60 through a LCH Pure SN30 non-woven sterile swab, and cells are washed and concentrated in a clean  
61 buffer (the extracellular solution used for electrophysiology, see below) using gravitaxis (Naitoh and  
62 Eckert, 1972). Indeed, *Paramecia* tend to accumulate at the top of any aqueous solution. Once a droplet  
63 of culture (typically 600  $\mu$ L) is placed in a narrow neck volumetric flask, one can then recover a  
64 concentrated population at the top of the flask.

### 65 Device fabrication and assembly

66 The device was engineered to provide immobilization of *Paramecia* by suction on the filter. It was  
67 fabricated with a combination of laser-cutting and micro-milling techniques. It consists of two thin  
68 Plexiglas plates (lower plate thickness ~2.7 mm, upper plate thickness ~1.3 mm) that sandwich a filter  
69 once they are tightly screwed together (Fig. 1A). For our experiments, we have used in particular  
70 transparent engineered Whatman Cyclopore polycarbonate membranes (diameter 25 mm, pore  
71 diameter 12  $\mu\text{m}$ ). Note that before assembly, the filter is first wet with water to ensure good adhesion  
72 with the device. The upper plate was laser-cut with a circular and centered hole (diameter 5 mm) in  
73 order to form a pool-like structure in which *Paramecia* can swim freely, once apposed against the  
74 lower plate. A mesa-like structure (diameter 4 mm, height 100  $\mu\text{m}$ ) was micro-milled in the center of  
75 the lower plate using a three-axis commercial desktop CNC Mini-Mill machine (Minitech Machinery  
76 Corp., USA) as shown in Figures 1B and 1C. The mesa's purpose is to allow for the stretching of the  
77 filter just like a thin membrane is stretched on a drum. On the mesa structure, microfluidic channels  
78 (width 300  $\mu\text{m}$ , depth 100  $\mu\text{m}$ ) were then micro-milled with the cross-like geometry shown in Figures  
79 1a and 1b. Finally, a small through-hole (diameter 300  $\mu\text{m}$ ) was drilled in the center of the mesa, and  
80 eventually enlarged (diameter 600  $\mu\text{m}$ ) on 2 mm from the lower side of the plate. This allowed to insert  
81 a small metallic tube (tubing connector SC23/8, Phymep) that acts as a fluid outlet and to which  
82 external tubing can be easily connected and with which suction can be applied (Fig. 1C). The geometry  
83 of the microfluidic pattern was chosen to prevent any local bending of the filter while the mesa  
84 structure avoids larger height fluctuations, upon suction. Both plates were drilled with through-holes  
85 (diameter 2.2 mm) so screws (2 mm in diameter) combined with bolts could be used to assemble both  
86 parts of the device.

## 87 **Principle of the immobilization process**

88 *Paramecia* are immobilized by simply sucking the liquid bath through the filter. As shown in the upper  
89 panel of Fig. 1D, without suction, *Paramecia* swim freely. But, as soon as suction is switched on (Fig. 1D,  
90 lower panel), the resulting hydrodynamic flux in the bath immobilizes the *Paramecia* against the filter.

## 91 **Pumping methods**

92 The bathing liquid is pumped using either a peristaltic pump or a depression tank. It is reinjected in  
93 the pool to maintain a constant volume of the bath. In the case of a peristaltic pump, the tube of a Gilson  
94 Minipulse 3 pump is first filled with the medium (see extracellular solution in Electrophysiology,  
95 below). When using a depression tank, the device outlet is connected to a sealed glass jar with two  
96 entries, one for the tube from the device, and another one used to depressurize it to about -150 mbar.  
97 To apply a controlled pressure, we use a microfluidic flow controller (OB1 Mk3, Elveflow). However, a  
98 simple syringe can also be used to lower the pressure in the jar. Volume of the bath is maintained by  
99 being supplemented with a gravity perfusion system at a flow rate of 5 mL/min, while the excess  
100 solution is drained from the top by a peristaltic pump. In this way, it is possible to use the  
101 immobilization device together with the perfusion system, for example to exchange solutions while  
102 the *Paramecium* is immobilized, as shown on Supplementary Figure 1.

103

104

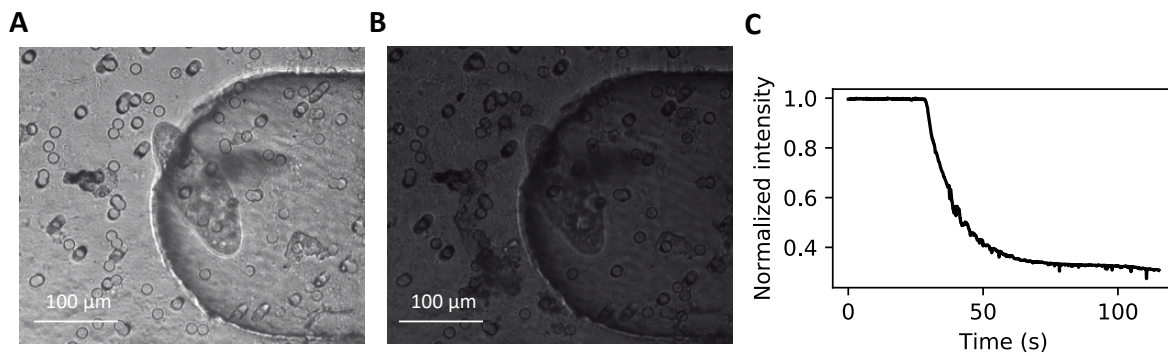

105

106 **Supplementary Figure 1. Solution exchange while a Paramecium is immobilized.** (A)  
107 Paramecium immobilized against the filter by depression. (B) Immobilized Paramecium at the end of  
108 the solution exchange. (C) Change in normalized image intensity after the bath is replaced by a solution  
109 stained with Copper chlorophyllin, using a gravity perfusion system. Normalized intensity decreases  
110 at an initial rate of 0.04 / s, which is the expected value for an exchange flow rate of 5 mL/min and a  
111 2 mL bath volume.

112

### 113 **Electrophysiology**

114 For all experiments, we used a controlled extracellular solution consisting of 1 mM CaCl<sub>2</sub>, 4 mM KCl  
115 and 1 mM Tris-Hcl, pH=7.2. Microelectrodes of resistance  $\approx 50 \text{ M}\Omega$  were pulled with a single step from  
116 standard wall borosilicate capillary glass with filament (OD 1 mm, ID 0.5 mm, Harvard Apparatus)  
117 using a micropipette puller (P-1000, Sutter Instrument). They were filled with a 1M KCl solution using  
118 a MicroFil non-metallic syringe needle (MF 34G-5, World Precision Instruments).

119 Custom Python programs (<https://github.com/romainbrette/clampy>) are used to control the analog-  
120 digital acquisition board (USB-6343, National Instruments) connected to the amplifier (Axoclamp 2B,  
121 Axon Instruments) operating at a sampling frequency of 40 kHz. After cell immobilization, the  
122 microelectrode is lowered into the cell until the measured potential drops by about 20 mV. The  
123 procedure is repeated with a second electrode. The pump or depression is then stopped. Square  
124 current pulses of amplitude 500 pA and duration 100 ms are then injected to tune the amplifier's  
125 capacitance neutralization circuit.

126

### 127 **Microscopy**

128 We image *Paramecium* using an upright microscope (LNScope, Luigs & Newmann) with two objectives,  
129 an air 20x objective (SLMPLN Plan Achromat, Olympus) used to locate cells, and a water immersion  
130 40x objective (LUMPLFLN, Olympus) with DIC contrast enhancement for electrophysiology and  
131 microinjection. For visualization and recording, we use a high speed and high sensitivity CCD camera  
132 (Lumenera Infinity 3-6UR, 2752 x 2192 pixels<sup>2</sup>, 8 or 14 bit depth, 27 frames/s at full resolution). For  
133 fluorescence measurements, the setup is illuminated with a CoolLED pE-300 ultra combined with a  
134 Cy3 filter.

135

### 136 **Microinjection**

137 Glass microinjection pipettes are pulled to an estimated outer diameter of 0.7-0.9  $\mu\text{m}$  in one step using  
138 the same pipette puller as described above. The back of the pipette is connected to a microfluidic flow  
139 controller (OB1-Mk3, Elveflow) and controlled with ESI software (Elveflow Smart interface). The  
140 baseline pressure is set to 5 mbar, such that there is no net flow through the micropipette. *Paramecia*  
141 are injected with a solution containing 60  $\mu\text{M}$  Alexa-594 fluorophore dye and 20 mM KCl, by applying  
142 a 100 ms long pulse at a pressure of 300 mbar.

143

## 144 **RESULTS AND DISCUSSION**

### 145 **Immobilization**

146 *Paramecia* swimming in a large drop are placed over the device. A downward flow can then be induced  
147 by two means. In the first configuration, a peristaltic pump draws fluid from the bath and pours it back  
148 at the top (see Movie 1, Supplemental Material). When the flow rate is greater than about 0.7 mL/min,  
149 *Paramecia* are pulled down and immobilized against the filter typically after a few seconds. Although  
150 *Paramecia* cannot swim, their cilia still beat. When the pump is stopped, *Paramecia* immediately swim  
151 away from the filter. Note that in practice, *Paramecia* can be immobilized by one or several holes  
152 constraining them in vertical or horizontal positions respectively. The hole diameter of the filter has  
153 thus to be smaller than the considered cell size.

154 In an earlier version of the device, the filter moved in the vertical direction by about 30  $\mu\text{m}$  when the  
155 pump was turned on, as it pulled on it. To solve this issue, the filter is put on a slightly raised platform  
156 (see Methods), so that it gets stretched when the upper lid is screwed over the bottom part of the  
157 device. No measurable movement is then observed when the pump is turned on.

158 Since the peristaltic pump can introduce a periodic pulsation of *Paramecia*'s vertical positions, we also  
159 implemented a second configuration in which downward flow is induced by a negative pressure. In  
160 this configuration, the outlet is connected to a sealed reservoir. When the reservoir is depressurized  
161 at about -150 mbar, *Paramecia* are immobilized against the filter (see Movie 2, Supplemental Material).  
162 This pressure difference imposes a flow rate of about 0.7 mL/min into the reservoir, as in the first  
163 configuration. To maintain the liquid bath surface level in the pool, we use a gravity-based perfusion  
164 system that yields a flow rate of 5 mL/min, while the excess fluid is removed with a peristaltic pump.  
165 Perfusion can be used simultaneously with the depression; Movie 3 and Supplementary Figure 1 show  
166 a solution exchange while *Paramecium* is immobilized by depression.

167

### 168 **Electrophysiology**

169 After immobilization, a pipette can be lowered into the cell. Figure 2A shows a *Paramecium* impaled  
170 with two sharp microelectrodes. Impalement is facilitated by the fact that, in contrast with the droplet  
171 technique, an electrical signal is available while the electrode is lowered. Indeed, entry of the  
172 microelectrode into the cytosol is witnessed by a voltage drop (Figure 2B and Movie 4). Once both  
173 microelectrodes are in place, the pumping flow is stopped. Figure 2C shows action potentials recorded  
174 by one electrode in response to current steps injected through the other electrode. If the pump is left  
175 running, the pulsation can be observed on the cell's membrane but it usually does not impact the  
176 measured membrane potential (Movie 5). However, in one case we observed transient  
177 hyperpolarizations synchronized with the pulsation, indicative of mechanosensitive responses  
178 (Machemer and Deitmer, 1985). Therefore, it is advisable to switch off the pump or to avoid the  
179 pulsation by using the depression configuration.



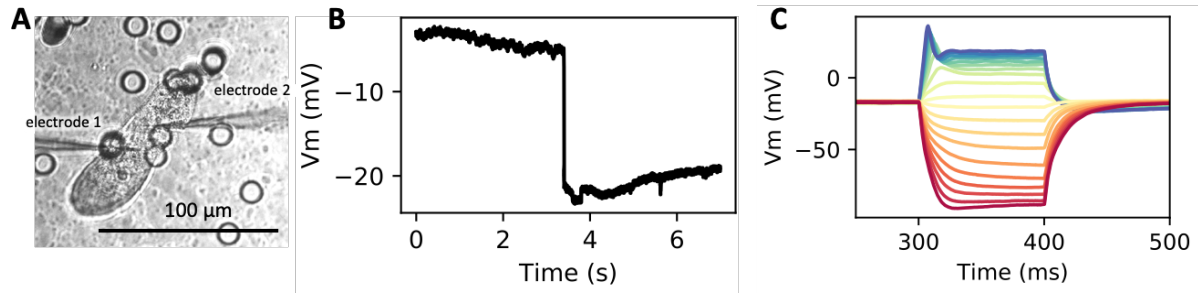

180

181 **Figure 2.** Electrophysiology on immobilized *Paramecium*. (A) Immobilized *Paramecium* impaled by two  
182 microelectrodes. (B) Membrane potential measured while the electrode is descended into the cell. Successful  
183 impalement is signaled by a sudden voltage drop. (C) Action potentials recorded in response to current steps  
184 of intensity -4 nA (red) to 4 nA (blue), by steps of 400 pA.

185

## 186 Microinjection

187 Next, we perform a microinjection of a fluorescent solution in the cytosol of *Paramecium*. Since our  
188 specimens display green autofluorescence (Wyroba et al., 1981), we chose the red fluorophore Alexa  
189 Fluor-594 (Figure 3 and Movie 6, Supplemental Material). While the pump is still running, the  
190 fluorophore is injected by pressure (Figure 3A) and then removed. Figure 3B shows the fluorescent  
191 *Paramecium* a few minutes after microinjection. Noticeably, it swims normally once immobilization is  
192 stopped and retains its fluorescent content.

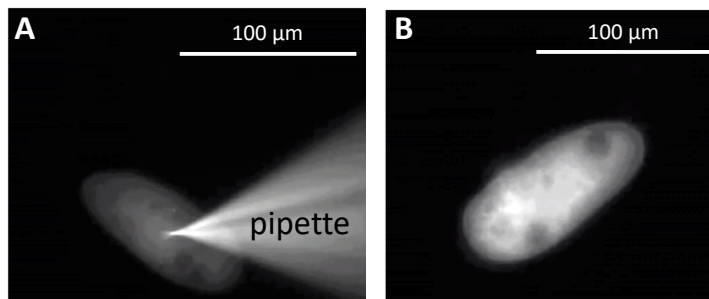

193

194 **Figure 3.** Microinjection of a fluorescent probe in an immobilized *Paramecium*. (A) *Paramecium* impaled by  
195 a microinjection pipette that contains Alexa Fluor-594. (B) Snapshot of a freely swimming *Paramecium*  
196 a few minutes after injection.

197

## 198 Discussion

199 The device presented here was designed to ease the manipulation of motile *Paramecium* for both  
200 intracellular electrophysiology and microinjection measurements. Traditional methods mostly relied  
201 on trapping *Paramecium* in microdroplets. Two typical configurations were used, either trapping a  
202 single *Paramecium* in an aqueous droplet immersed in oil (Beisson et al., 2010), or confining it in an  
203 evaporating water droplet (Naitoh and Eckert, 1972). In the latter case, the time window during which  
204 one can approach a micropipette before *Paramecium* dies is very narrow, which leads to high failure  
205 rates. The former case is not adapted to electrophysiology because the micropipette tip gets  
206 contaminated with oil. In contrast, our method is easy to implement, highly reproducible, inexpensive  
207 and does not alter *Paramecium*'s viability. In particular, the immobilization can be obtained with any  
208 device that imposes a fluid flow such as peristaltic pumps, pressure controllers or syringe pumps. An

209 additional benefit is that an electrical signal is available during the procedure, allowing one to verify  
210 the proper insertion of microelectrodes. Finally, our device allows for a straightforward medium  
211 exchange and is thus appropriate for easy drug testing on *Paramecium*.

212 One thus expects this device to be useful to efficiently trap any other type of motile protists or  
213 microorganisms provided that their typical size remains larger than the size of the filter holes. Beyond  
214 electrophysiology and microinjection, it may also allow imaging live cells over long periods of times,  
215 such as the sexual cycle. In the future, this immobilization technique could be straightforwardly  
216 automated by controlling the pump or using solenoid valves, which could allow complete automation  
217 of an electrophysiological or microinjection experiment.

218

## 219 **ACKNOWLEDGMENTS**

220 The authors thank Eric Meyer for providing specimens and advice on culture and manipulation of  
221 *Paramecium*, and Martijn Sierksma for advice on electrophysiology.

222

## 223 **COMPETING INTERESTS**

224 The authors declare no competing interests.

225

## 226 **FUNDING**

227 This work was funded by CNRS (Défi Mécanobiologie, project PERCÉE), Sorbonne Université  
228 (Emergence, project NEUROSIM) and Agence Nationale de la Recherche (grant ANR-14-CE13-  
229 0003).

230

## **REFERENCES**

Beisson J, Bétermier M, Bré M-H, Cohen J, Duharcourt S, Duret L, Kung C, Malinsky S, Meyer E, Preer JR, Sperling L. 2010. DNA Microinjection into the Macronucleus of *Paramecium*. *Cold Spring Harb Protoc* **2010**:pdb.prot5364. doi:10.1101/pdb.prot5364

Hennessey TM, Kuruvilla HG. 1999. Chapter 17 Electrophysiology of Tetrahymena In: Asai DJ, Forney JD, editors. *Methods in Cell Biology*. Academic Press. pp. 363–377. doi:10.1016/S0091-679X(08)61543-5

Houten JV. 1979. Membrane potential changes during chemokinesis in *Paramecium*. *Science* **204**:1100–1103. doi:10.1126/science.572085

Jonsson L, Sand O. 1987. Electrophysiological Recordings from Ciliates In: Scheving LE, Halberg F, Ehret CF, editors. *Chronobiotechnology and Chronobiological Engineering*, NATO ASI Series. Dordrecht: Springer Netherlands. pp. 432–434. doi:10.1007/978-94-009-3547-1\_41

Machemer H, Deitmer JW. 1985. Mechanoreception in Ciliates In: Autrum H, Ottoson D, Perl ER, Schmidt RF, Shimazu H, Willis WD, editors. *Progress in Sensory Physiology*, Progress in Sensory Physiology. Berlin, Heidelberg: Springer Berlin Heidelberg. pp. 81–118. doi:10.1007/978-3-642-70408-6\_2



Naitoh Y, Eckert R. 1972. Electrophysiology of Ciliate Protozoa. *Exp. in Physiol. and Biochem.* pp. 17–31.

Valentine MS, Van Houten JL. 2016. Methods for Studying Ciliary-Mediated Chemoresponse in *Paramecium*. *Methods Mol Biol Clifton NJ* **1454**:149–168. doi:10.1007/978-1-4939-3789-9\_10

Wyroba E, Bottiroli G, P G. 1981. Autofluorescence of axenically cultivated *Paramecium aurelia*. *Acta Protozool* **20**:165–170.
